# Supplementary material for: Teachers’ Emotional Exhaustion: Associations With Their Typical Use of and Implicit Attitudes Toward Emotion Regulation Strategies
Source: PubMed Central journal article supplement (PMC7273523; doi:10.3389/fpsyg.2020.00867), 2020-05-29
Supplement: Data_Sheet_2.pdf [file Data_Sheet_2.pdf]

**Supplementary material B:**

**Graphical representations of the insignificant moderation effects**

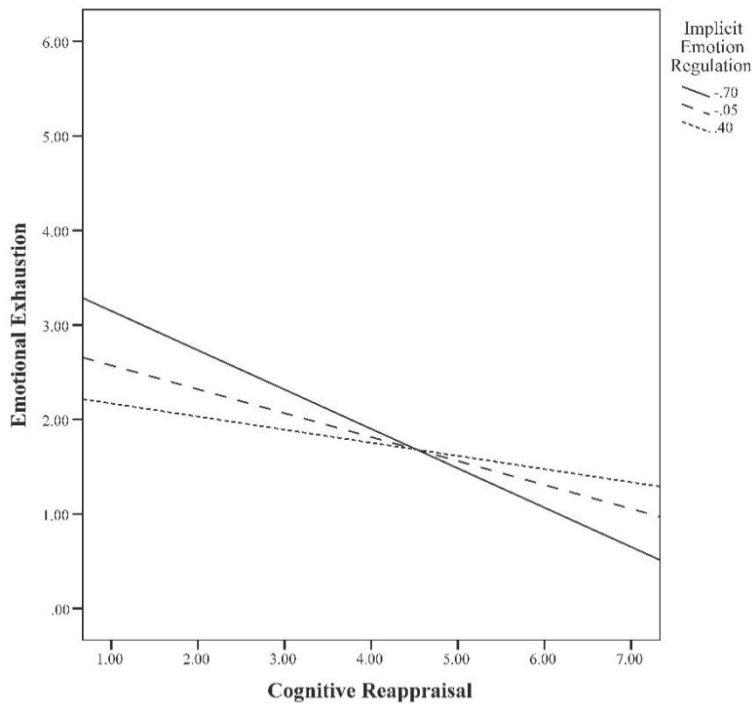

Figure B1. Visualization of the moderating effect of implicit attitudes towards emotion regulation on the relationship between cognitive reappraisal and emotional exhaustion (step 2).

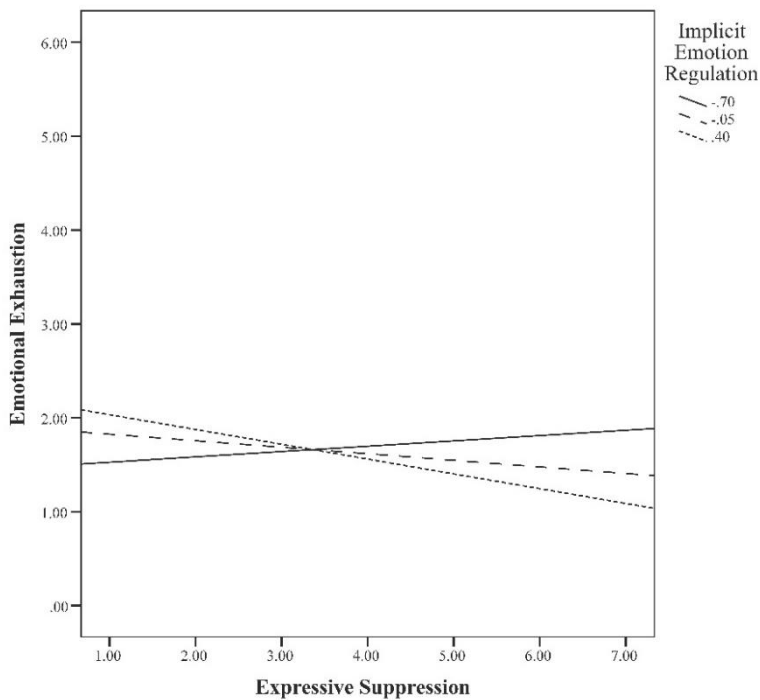

Figure B2. Visualization of the moderating effect of implicit attitudes towards emotion regulation on the relationship between expressive suppression and emotional exhaustion (step 2).
